# Supplementary material for: Highly active MnO2 nanosheet synthesis from graphene oxide templates and their application in efficient oxidative degradation of methylene blue
Source: Royal Society of Chemistry journal article supplement (doi:10.1039/c3ra40942b), 2013-01-01
Supplement: c3ra40942b.pdf [file c3ra40942b.pdf]

Electronic Supplementary Information for

# Highly active MnO<sub>2</sub> nanosheets synthesis from graphene oxide templates and their application in efficient oxidative degradation of methylene blue

5 Guixia Zhao, Jiaying Li, Xuemei Ren, Jun Hu, Wenping Hu and Xiangke Wang\*

## Preparation of graphene oxide and layered MnO<sub>2</sub> nanosheets

Graphene oxide was prepared using modified Hummers method from flake graphite (average particle diameter of 20 μm, 99.95% purity, Qingdao Tianhe Graphite Co. Ltd., China). Briefly, 2.0 g of graphite and 1.5 g of NaNO<sub>3</sub> (A.R.) were placed in a flask. Then, 150 mL of H<sub>2</sub>SO<sub>4</sub> (A.R.) was added with stirring in an ice-water bath, and 9.0 g of KMnO<sub>4</sub> (A.R.) was slowly added over about 1 h. The stirring was continued for 2 h in ice-water bath and continually stirred for 5 d at room temperature. Then 280 mL of 5 wt % H<sub>2</sub>SO<sub>4</sub> was added over about 1 h with stirring, and the temperature was kept at 98 °C. The resultant mixture was further stirred for 2 h at 98 °C. After the temperature was reduced to 60 °C, 6 mL of H<sub>2</sub>O<sub>2</sub> (30 wt %) was added, and the mixture was stirred for 2 h at room temperature. After centrifugation at 8000 rpm, the solid was redispersed using vigorous stirring and bath ultrasonication for 30 min at the power of 140 W. The centrifugation and ultrasonication were recycled for several times, and then the sample was rinsed with deionized water until the solution was neutral. Thus the graphene oxides were prepared. Then 5 mL of KMnO<sub>4</sub> solution (16 g/L) was added into 100 mL above graphene oxide suspension (about 0.1 g/L), and the mixture suspension was kept in thermostat water bath at 60 °C for 15 h. The resulted materials were rinsed with deionized water and the layered MnO<sub>2</sub> nanosheets were obtained.

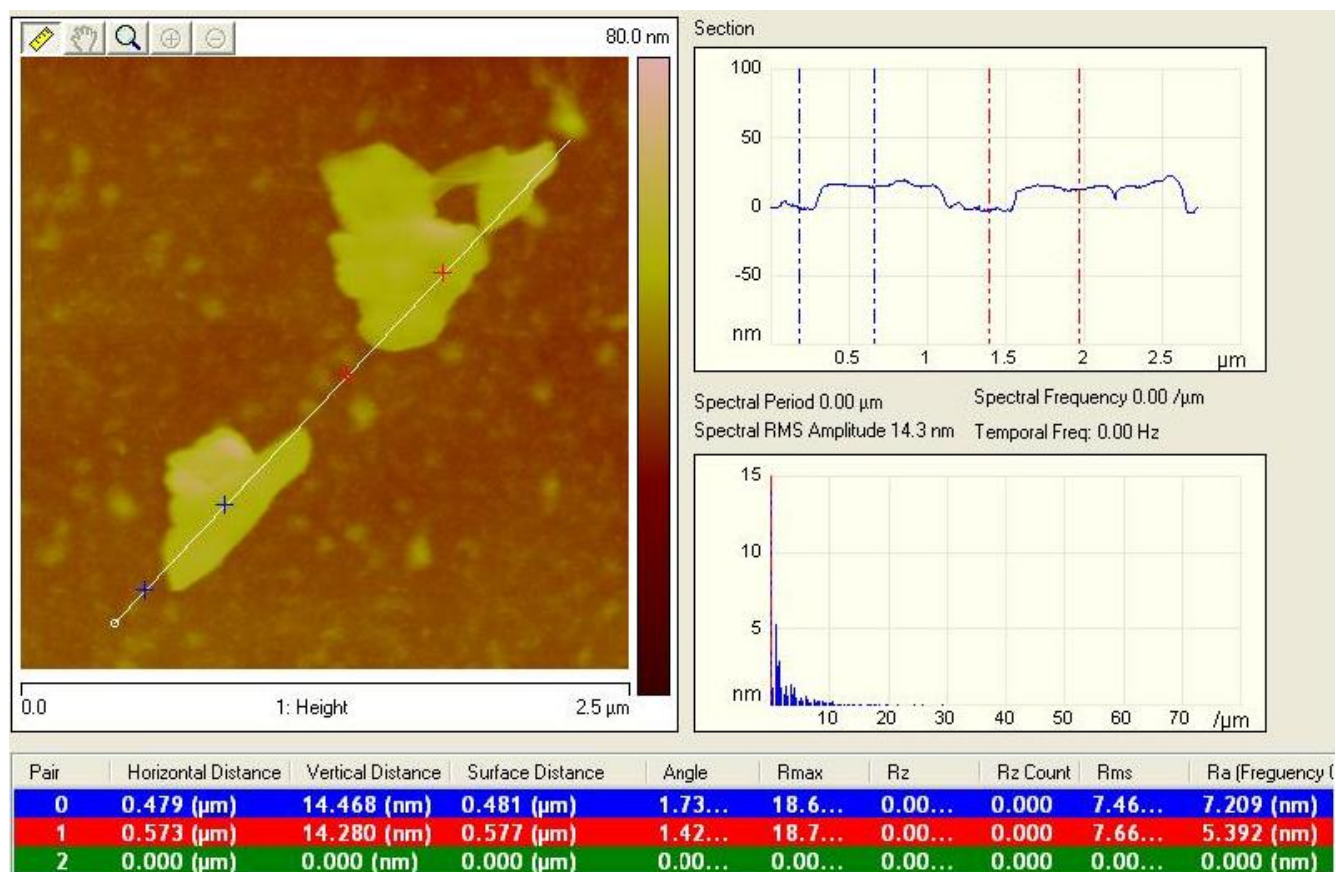

**Figure S1.** AFM image of the as-prepared MnO<sub>2</sub> sheets.

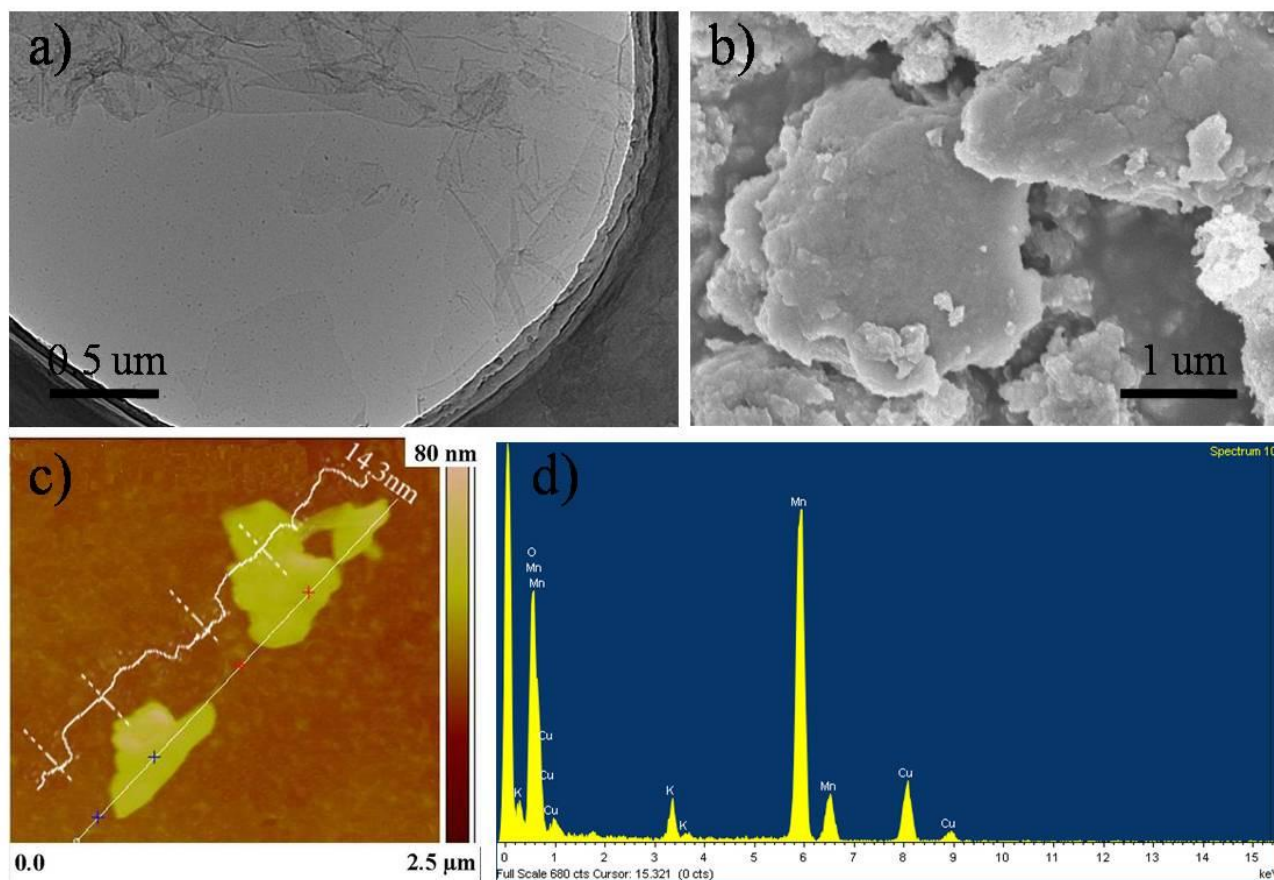

**Figure S2.** a) TEM image of graphene oxide template; b) SEM image of layered MnO<sub>2</sub> nanosheets; c) AFM of layered MnO<sub>2</sub> nanosheets; d) EDS of layered MnO<sub>2</sub> nanosheets on copper grid and the contents of the corresponding elements. [Figure S1c is reproduced from Ref. 1]

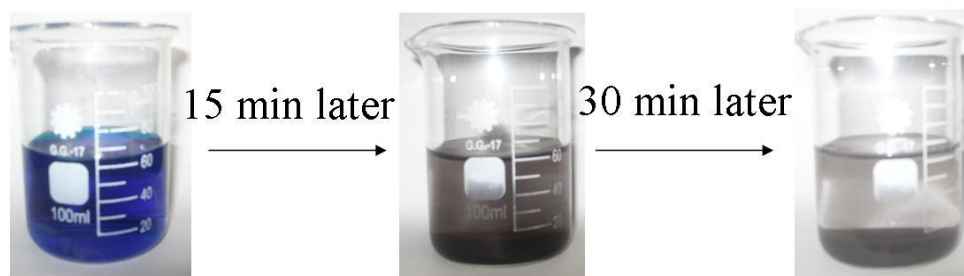

**Figure S3.** The pictures of the MB dye (40 mg/L) suspension taken at different time intervals of the degradation using layered  $\text{MnO}_2$  nanosheets (0.75 g/L) at  $\text{pH}=3.1$ .

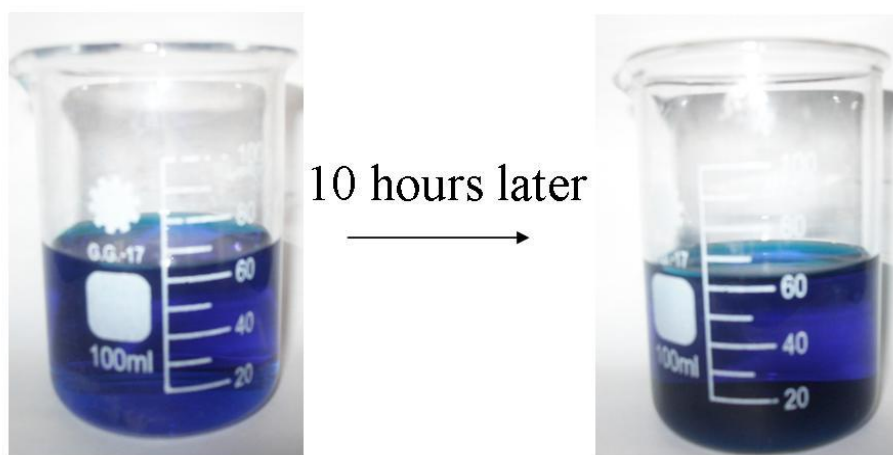

**5 Figure S4.** The pictures of the MB (40 mg/L) suspension before and after 10 hour-interaction with the purchased  $\text{MnO}_2$  at  $\text{pH}=3.1$  (0.75 g/L).

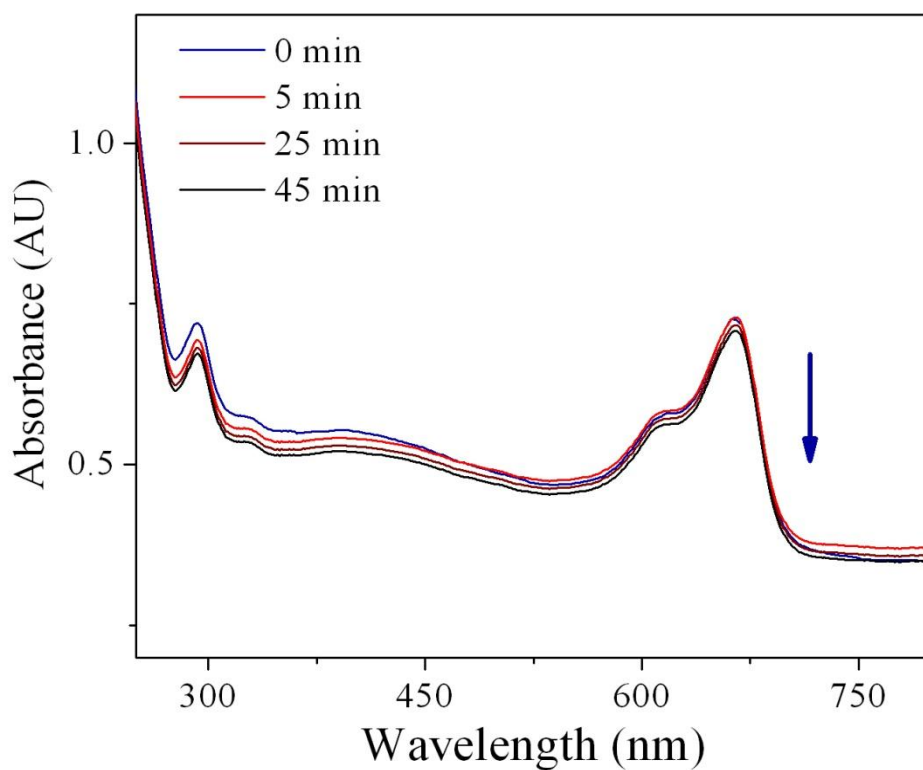

**Figure S5.** The UV-Vis spectra of MB solution, obtained by removing  $\text{MnO}_2$  using sufficient oxalate acid solution after different interaction time with  $\text{MnO}_2$  nanosheets at  $\text{pH}=9.0$ . The initial MB dye concentration is 10 mg/L, and the concentration of  $\text{MnO}_2$  nanosheets is 0.75 g/L.

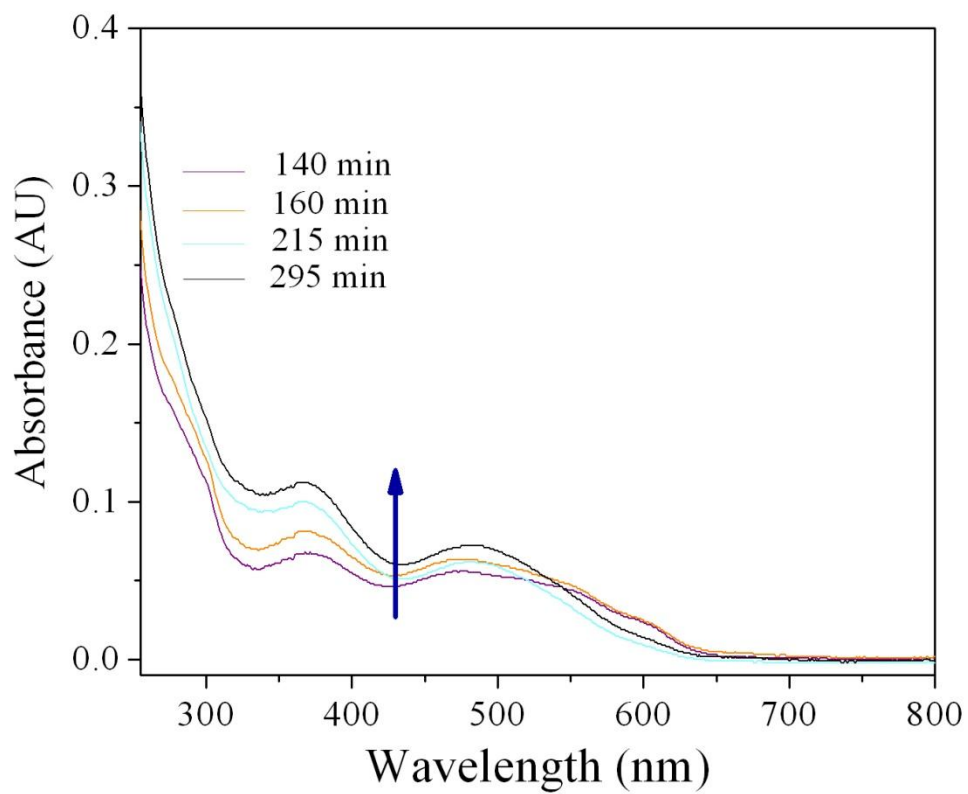

**Figure S6.** The UV-Vis absorbance spectra of MB dye solution taken at the later period of the oxidation process at pH=3.1. The initial MB dye concentration is 10 mg/L, and the concentration of MnO<sub>2</sub> nanosheets is 0.75 g/L.

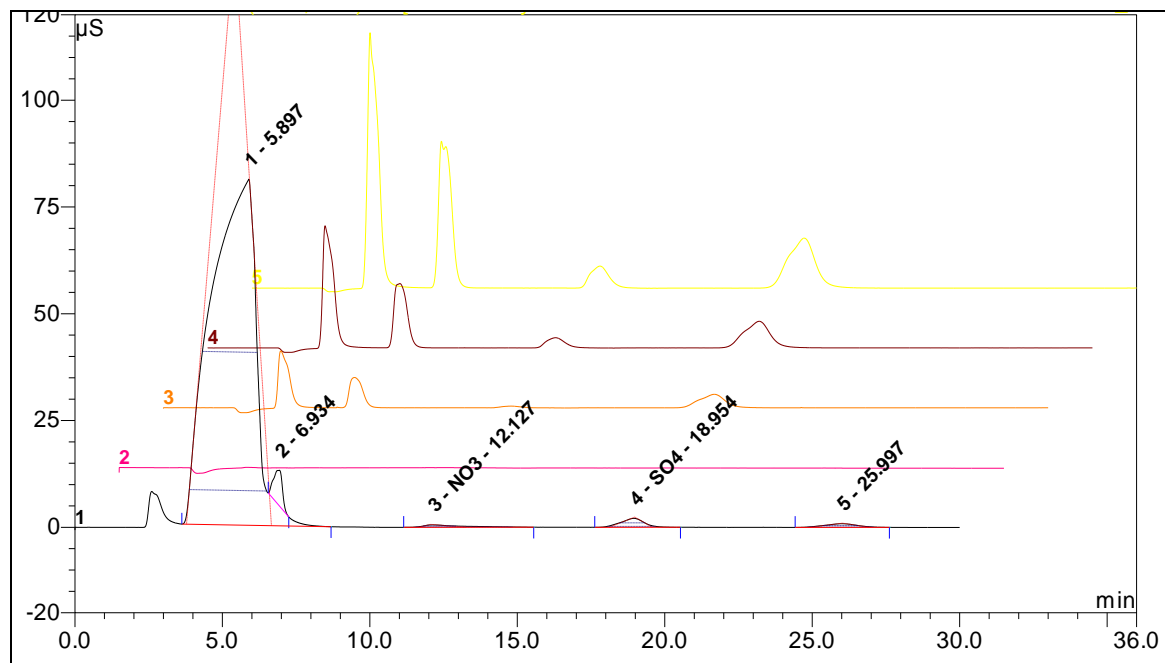

**Figure S7.** The ion chromatogram of  $\text{SO}_4^{2-}$  and  $\text{NO}_3^-$  in the final degradation system at  $\text{pH}=3.1$  (line 1) and the standard solution with different concentrations of  $\text{F}^-$ ,  $\text{Cl}^-$ ,  $\text{SO}_4^{2-}$  and  $\text{NO}_3^-$  (lines 2, 3, 4). The retention time of  $\text{SO}_4^{2-}$  and  $\text{NO}_3^-$  is 18.85 min and 12.13 min, respectively.

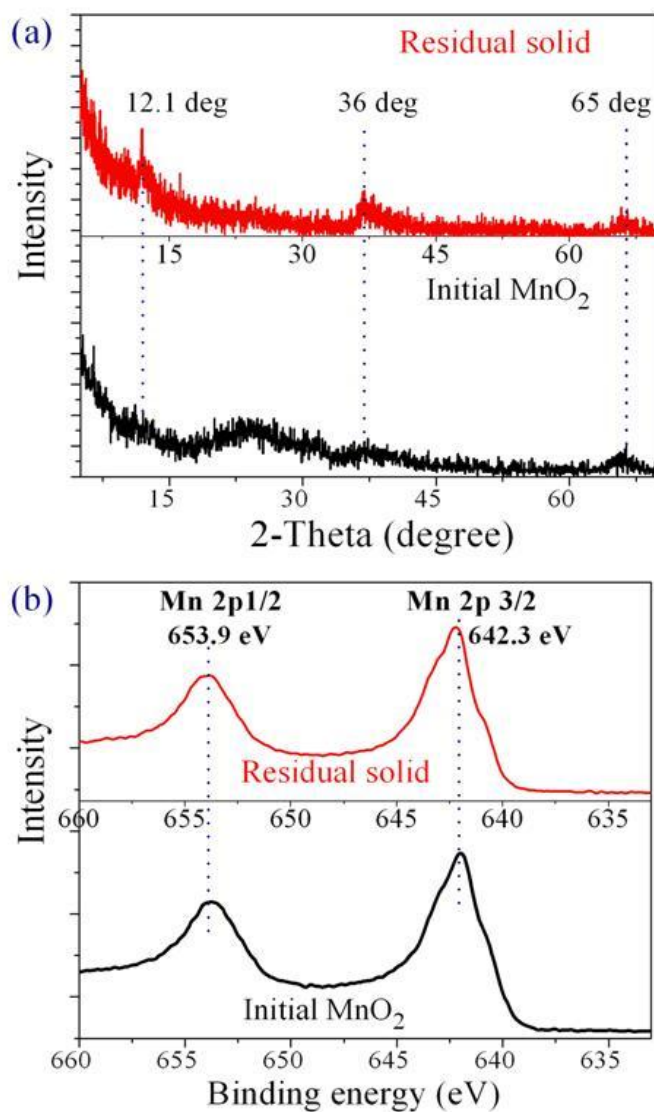

**Figure S8.** The XRD and XPS analysis of the residual solid (after degradation for 300 min) in the degradation suspension and the initial layered MnO<sub>2</sub> nanosheets.

### References

- 5 [1] G. Zhao, J. Li, L. Jiang, H. Dong, X. Wang and W. Hu, *Chem. Sci.* 2012, **3**, 433.
